# Supplementary material
Source: HighWire-hosted journal article supplement (https://www.annfammed.org/content/suppl/2015/05/11/13.3.214)
Supplement: Cecil_Supp_App_1-3.pdf [file Cecil_Supp_App_1-3.pdf]

Supplementary materials for:

Cecil E, Bottle A, Sharland M, Saxena S. Impact of UK primary care policy reforms on short-stay unplanned hospital admissions for children with primary care-sensitive conditions. *Ann Fam Med*. 2015;13(3):214-220.

## Appendix 1

AHRQ Clinical Classifications Software (CCS) clinical codes used to define outcomes of primary care sensitive infectious illness and chronic conditions in children

| <b>Broad Category</b> | <b>CCS Category</b>                                      |
|-----------------------|----------------------------------------------------------|
| Chronic disease       | Acquired foot deformities                                |
| Chronic disease       | Acute and unspecified renal failure                      |
| Chronic disease       | Acute cerebrovascular disease                            |
| Chronic disease       | Acute posthemorrhagic anemia                             |
| Chronic disease       | Anal and rectal conditions                               |
| Chronic disease       | Aortic and peripheral arterial embolism or thrombosis    |
| Chronic disease       | Aortic; peripheral; and visceral artery aneurysms        |
| Chronic disease       | Aspiration pneumonitis; food/vomit                       |
| Chronic disease       | Asthma                                                   |
| Chronic disease       | Biliary tract disease                                    |
| Chronic disease       | Blindness and vision defects                             |
| Chronic disease       | Calculus of urinary tract                                |
| Chronic disease       | Cardiac and circulatory congenital anomalies             |
| Chronic disease       | Cardiac arrest and ventricular fibrillation              |
| Chronic disease       | Cardiac dysrhythmias                                     |
| Chronic disease       | Cataract                                                 |
| Chronic disease       | Chronic obstructive pulmonary disease and bronchiectasis |
| Chronic disease       | Chronic renal failure                                    |
| Chronic disease       | Chronic ulcer of skin                                    |
| Chronic disease       | Coagulation and hemorrhagic disorders                    |
| Chronic disease       | Coma; stupor; and brain damage                           |
| Chronic disease       | Conditions associated with dizziness or vertigo          |
| Chronic disease       | Conduction disorders                                     |
| Chronic disease       | Congestive heart failure; nonhypertensive                |
| Chronic disease       | Coronary atherosclerosis and Other heart disease         |
| Chronic disease       | Cystic fibrosis                                          |
| Chronic disease       | Deficiency and Other anemia                              |
| Chronic disease       | Diabetes mellitus with complications                     |
| Chronic disease       | Diabetes mellitus without complication                   |
| Chronic disease       | Digestive congenital anomalies                           |
| Chronic disease       | Diseases of mouth; excluding dental                      |
| Chronic disease       | Diseases of white blood cells                            |
| Chronic disease       | Disorders of lipid metabolism                            |
| Chronic disease       | Diverticulosis and diverticulitis                        |
| Chronic disease       | Endometriosis                                            |
| Chronic disease       | Esophageal disorders                                     |
| Chronic disease       | Essential hypertension                                   |
| Chronic disease       | Fluid and electrolyte disorders                          |
| Chronic disease       | Gastritis and duodenitis                                 |
| Chronic disease       | Gastroduodenal ulcer (except hemorrhage)                 |
| Chronic disease       | Gastrointestinal hemorrhage                              |
| Chronic disease       | Genitourinary congenital anomalies                       |

|                 |                                                             |
|-----------------|-------------------------------------------------------------|
| Chronic disease | Genitourinary symptoms and ill-defined conditions           |
| Chronic disease | Glaucoma                                                    |
| Chronic disease | Gout and Other crystal arthropathies                        |
| Chronic disease | Headache; including migraine                                |
| Chronic disease | Heart valve disorders                                       |
| Chronic disease | Hemolytic jaundice and perinatal jaundice                   |
| Chronic disease | Hemorrhoids                                                 |
| Chronic disease | Hyperplasia of prostate                                     |
| Chronic disease | Hypertension with complications and secondary hypertension  |
| Chronic disease | Immunity disorders                                          |
| Chronic disease | Inflammation; Infection of eye (except *)                   |
| Chronic disease | Inflammatory conditions of male genital organs              |
| Chronic disease | Inflammatory diseases of female pelvic organs               |
| Chronic disease | Late effects of cerebrovascular disease                     |
| Chronic disease | Lung disease due-external agents                            |
| Chronic disease | Malaise and fatigue                                         |
| Chronic disease | Menstrual disorders                                         |
| Chronic disease | Multiple sclerosis                                          |
| Chronic disease | Nephritis; nephrosis; renal sclerosis                       |
| Chronic disease | Nervous system congenital anomalies                         |
| Chronic disease | Non-infectious gastroenteritis                              |
| Chronic disease | Nonmalignant breast conditions                              |
| Chronic disease | Nonspecific chest pain                                      |
| Chronic disease | Nutritional deficiencies                                    |
| Chronic disease | Occlusion or stenosis of precerebral arteries               |
| Chronic disease | Osteoarthritis                                              |
| Chronic disease | Osteoporosis                                                |
| Chronic disease | Other acquired deformities                                  |
| Chronic disease | Other and ill-defined cerebrovascular disease               |
| Chronic disease | Other and ill-defined heart disease                         |
| Chronic disease | Other bone disease and musculoskeletal deformities          |
| Chronic disease | Other circulatory disease                                   |
| Chronic disease | Other congenital anomalies                                  |
| Chronic disease | Other connective tissue disease                             |
| Chronic disease | Other diseases of bladder and urethra                       |
| Chronic disease | Other diseases of kidney and ureters                        |
| Chronic disease | Other diseases of veins and lymphatics                      |
| Chronic disease | Other disorders of stomach and duodenum                     |
| Chronic disease | Other ear and sense organ disorders                         |
| Chronic disease | Other endocrine disorders                                   |
| Chronic disease | Other eye disorders                                         |
| Chronic disease | Other female genital disorders                              |
| Chronic disease | Other gastrointestinal disorders                            |
| Chronic disease | Other hematologic conditions                                |
| Chronic disease | Other hereditary and degenerative nervous system conditions |
| Chronic disease | Other inflammatory condition of skin                        |
| Chronic disease | Other liver diseases                                        |
| Chronic disease | Other lower respiratory disease                             |
| Chronic disease | Other male genital disorders                                |
| Chronic disease | Other nervous system disorders                              |
| Chronic disease | Other non-traumatic joint disorders                         |

|                       |                                                                   |
|-----------------------|-------------------------------------------------------------------|
| Chronic disease       | Other nutritional; endocrine; and metabolic disorders             |
| Chronic disease       | Other skin disorders                                              |
| Chronic disease       | Ovarian cyst                                                      |
| Chronic disease       | Pancreatic disorders (not diabetes)                               |
| Chronic disease       | Paralysis                                                         |
| Chronic disease       | Peri-; endo-; and myocarditis; cardiomyopathy (except *)          |
| Chronic disease       | Peripheral and visceral atherosclerosis                           |
| Chronic disease       | Peritonitis and intestinal abscess                                |
| Chronic disease       | Phlebitis; thrombophlebitis and thromboembolism                   |
| Chronic disease       | Pleurisy; pneumothorax; pulmonary collapse                        |
| Chronic disease       | Prolapse of female genital organs                                 |
| Chronic disease       | Pulmonary heart disease                                           |
| Chronic disease       | Regional enteritis and ulcerative colitis                         |
| Chronic disease       | Respiratory distress syndrome                                     |
| Chronic disease       | Respiratory failure; insufficiency; arrest (adult)                |
| Chronic disease       | Retinal detachments; defects; vascular occlusion; and retinopathy |
| Chronic disease       | Rheumatoid arthritis and related disease                          |
| Chronic disease       | Sickle cell anemia                                                |
| Chronic disease       | Spondylosis; intervertebral disc disorders; Other back problems   |
| Chronic disease       | Systemic lupus erythematosus and connective tissue disorders      |
| Chronic disease       | Thyroid disorders                                                 |
| Chronic disease       | Transient cerebral ischemia                                       |
| Chronic disease       | Varicose veins of lower extremity                                 |
| Chronic & Infection** | Epilepsy; convulsions                                             |
| Chronic & Infection** | Other upper respiratory disease                                   |
| Infection             | Abdominal pain                                                    |
| Infection             | Acute and chronic tonsillitis                                     |
| Infection             | Acute bronchitis                                                  |
| Infection             | Bacterial Infection; unspecified site                             |
| Infection             | Encephalitis (except *)                                           |
| Infection             | Fever of unknown origin                                           |
| Infection             | Gangrene                                                          |
| Infection             | Hepatitis                                                         |
| Infection             | HIV Infection                                                     |
| Infection             | Immunizations and screening for infectious disease                |
| Infection             | Infective arthritis and osteomyelitis (except*)                   |
| Infection             | Influenza                                                         |
| Infection             | Intestinal Infection                                              |
| Infection             | Lymphadenitis                                                     |
| Infection             | Meningitis (except*)                                              |
| Infection             | Mycoses                                                           |
| Infection             | Nausea and vomiting                                               |
| Infection             | Other CNS Infection and poliomyelitis                             |
| Infection             | Other Infections; including parasitic                             |
| Infection             | Other upper respiratory Infections                                |
| Infection             | Otitis media and related conditions                               |
| Infection             | Pneumonia                                                         |
| Infection             | Septicemia (except in labor)                                      |
| Infection             | Sexually transmitted Infections (not HIV or hepatitis)            |
| Infection             | Skin and subcutaneous tissue Infections                           |
| Infection             | Tuberculosis                                                      |

|           |                          |
|-----------|--------------------------|
| Infection | Urinary tract Infections |
| Infection | Viral Infection          |

*\* (except that caused by tuberculosis or sexually transmitted disease)*

*\*\*Chronic & Infection are where the ICD10 codes within the CCS group have been separately categorised.*

International classification of disease version 10 (ICD10) codes used to define outcomes of primary care sensitive infectious illness and chronic conditions in children where direct AHRQ Clinical Classifications Software group categorisation was not possible

| Broad Category  | CCS Category                    | ICD10* code | ICD10 Description                                           | Conditions     |
|-----------------|---------------------------------|-------------|-------------------------------------------------------------|----------------|
| Chronic disease | Epilepsy; convulsions           | G40         | Epilepsy                                                    |                |
| Chronic disease | Epilepsy; convulsions           | G41         | Status epilepticus                                          |                |
| Infection       | Epilepsy; convulsions           | R560        | Febrile convulsions                                         |                |
| Chronic disease | Epilepsy; convulsions           | R568        | Other and unspecified convulsions                           |                |
| Chronic disease | Other upper respiratory disease | J30         | Vasomotor and allergic rhinitis                             |                |
| Chronic disease | Other upper respiratory disease | J31         | Chronic rhinitis, nasopharyngitis and pharyngitis           |                |
| Chronic disease | Other upper respiratory disease | J33         | Nasal polyp                                                 |                |
| Chronic disease | Other upper respiratory disease | J34         | Other disorders of nose and nasal sinuses                   |                |
| Chronic disease | Other upper respiratory disease | J37         | Chronic laryngitis and laryngotracheitis                    |                |
| Chronic disease | Other upper respiratory disease | J38         | Disease of vocal cords and larynx, not elsewhere classified |                |
| Chronic disease | Other upper respiratory disease | J39         | Other disease of upper respiratory tract                    |                |
| Chronic disease | Other upper respiratory disease | J98         | Other respiratory disorders                                 |                |
| Chronic disease | Other upper respiratory disease | R04         | Hemorrhage from respiratory passages                        |                |
| Chronic disease | Other upper respiratory disease | R060        | Dyspnoea                                                    |                |
| Infection       | Other upper respiratory disease | R062        | Wheezing                                                    | if aged <1 yrs |
| Chronic         | Other upper respiratory disease | R062        | Wheezing                                                    | if aged 1+ yrs |
| Chronic disease | Other upper respiratory disease | R063        | Periodic breathing                                          |                |
| Chronic disease | Other upper respiratory disease | R064        | Hyperventilation                                            |                |
| Chronic disease | Other upper respiratory disease | R065        | Mouth breathing                                             |                |
| Chronic disease | Other upper respiratory disease | R067        | Sneezing                                                    |                |
| Chronic disease | Other upper respiratory disease | R068        | Other and unspecified abnormalities of breathing            |                |
| Chronic disease | Other upper respiratory disease | R07         | Pain in throat                                              |                |
| Chronic disease | Other upper respiratory disease | R49         | Voice disturbances                                          |                |

\*International classification of disease version 10

## Appendix 2

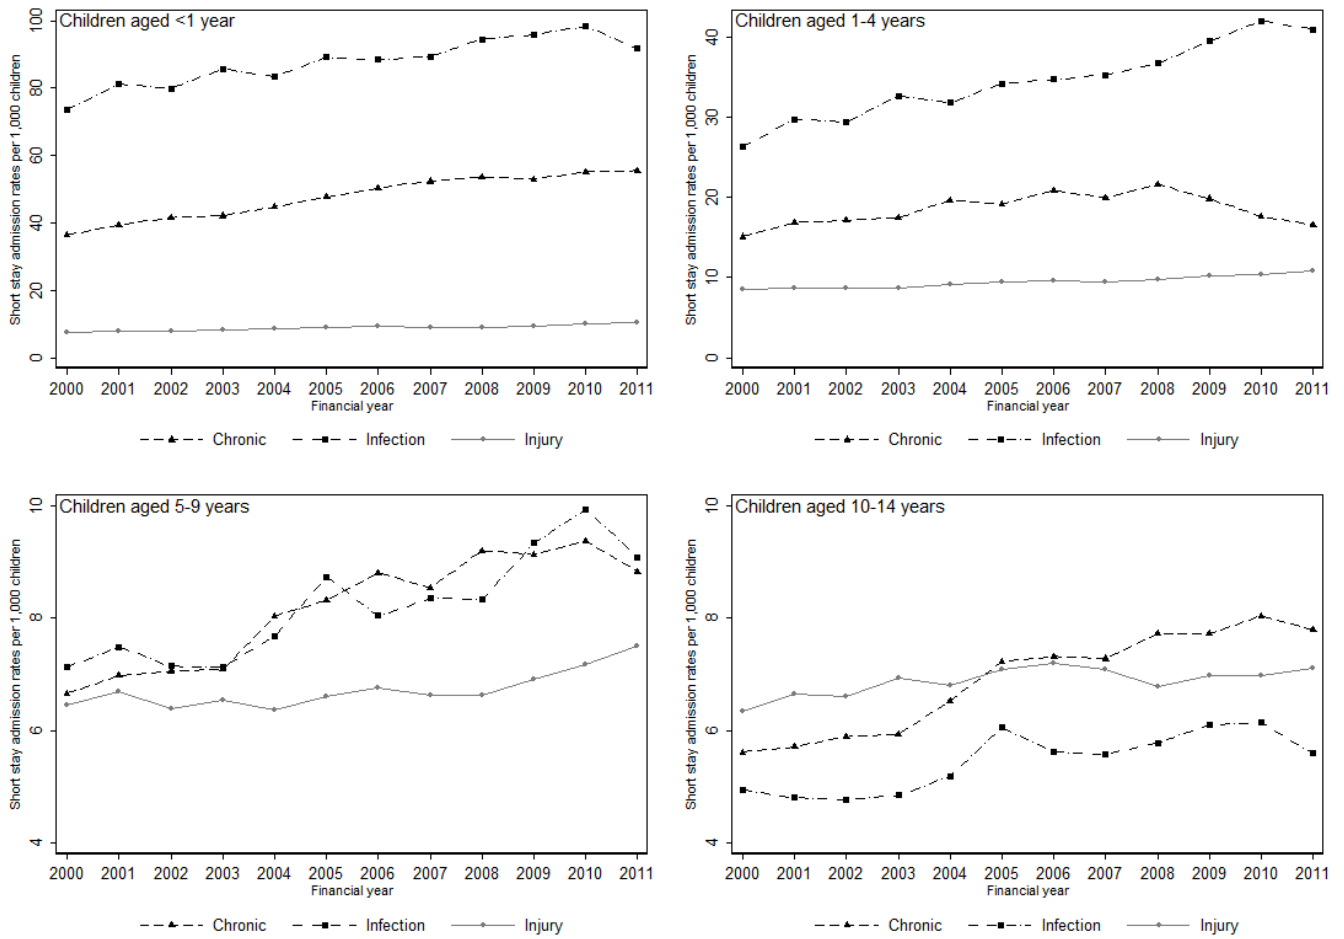

Figure 1: Age specific annual short stay admission rates per 1,000 children aged 0-14 years for infectious illness, chronic conditions and injury, from 2000-2011, in England.

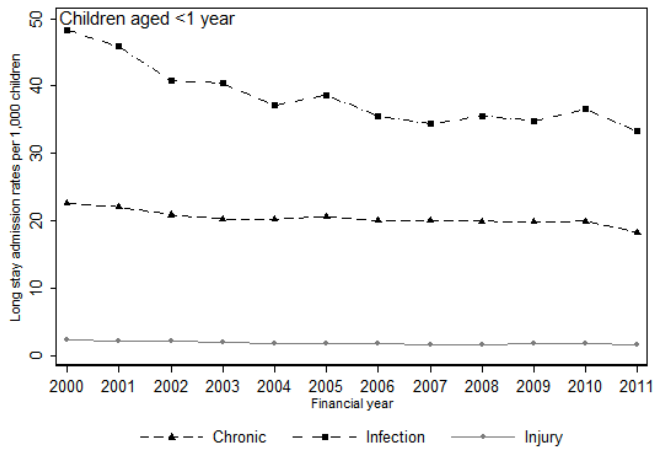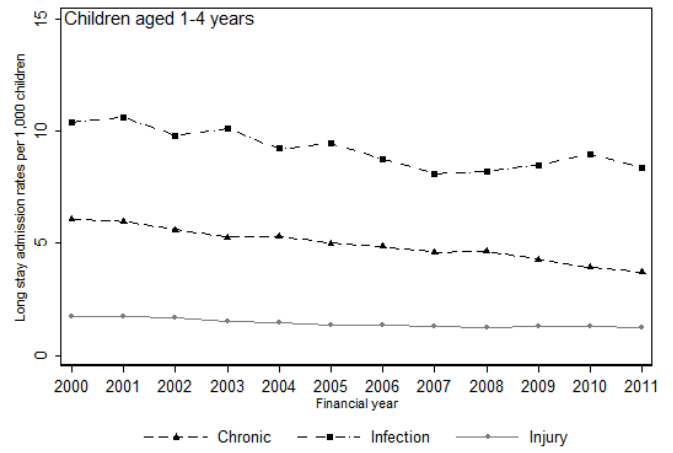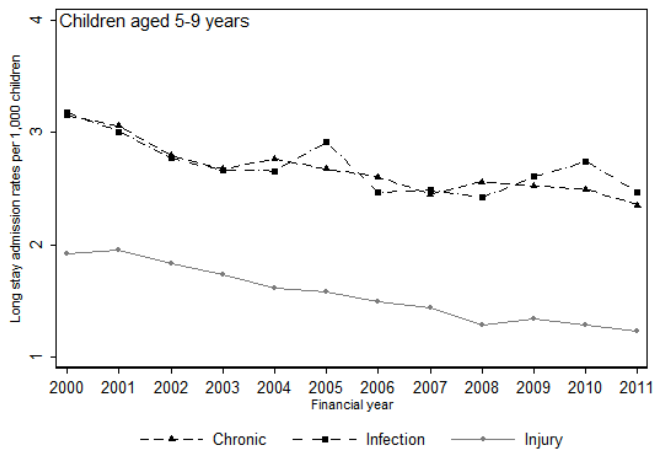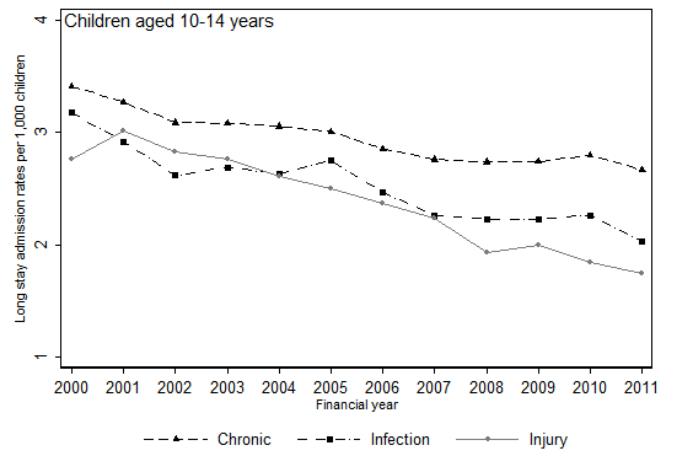

**Figure 2: Age specific annual long stay admission rates per 1,000 children aged 0-14 years for infectious illness, chronic conditions and injury, from 2000-2011, in England.**
